# Supplementary material for: Evaluation of the Antimicrobial Properties of a Natural Peptide from Vespa mandarinia Venom and Its Synthetic Analogues as a Possible Route to Defeat Drug-Resistant Microbes
Source: MDPI journal article supplement (doi:10.3390/biology11091263), 2022-08-25
Supplement: s1 [file s1]

## Supplementary Material

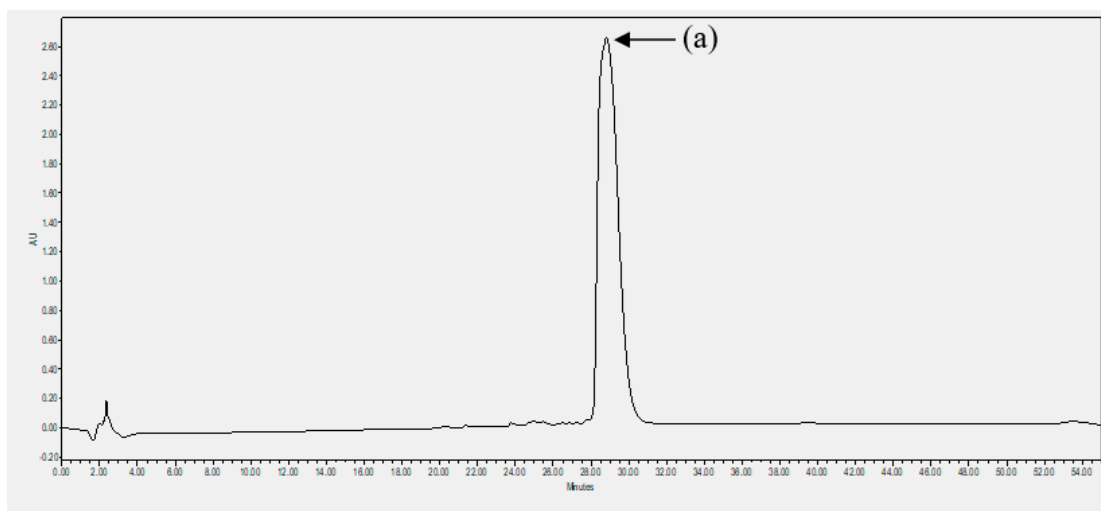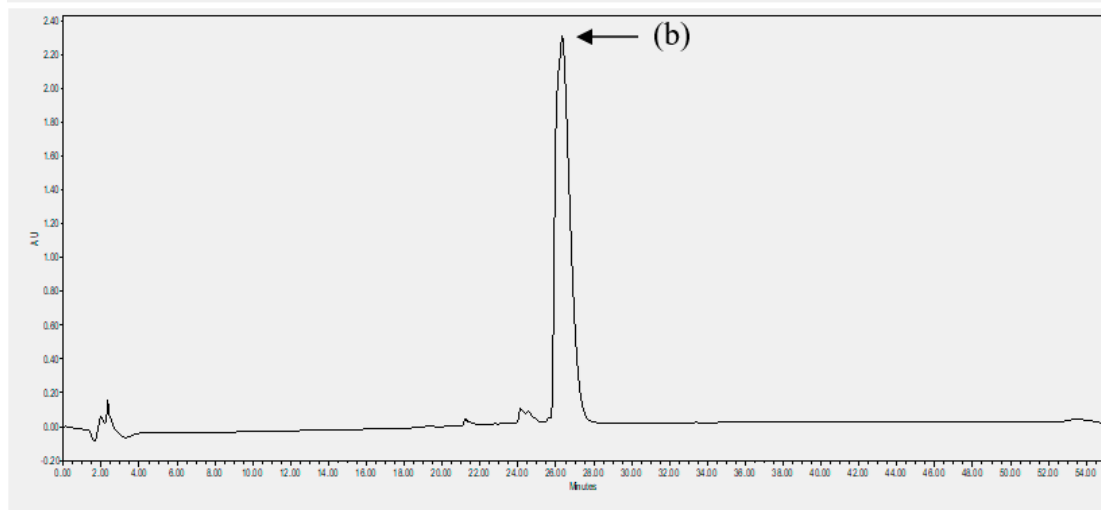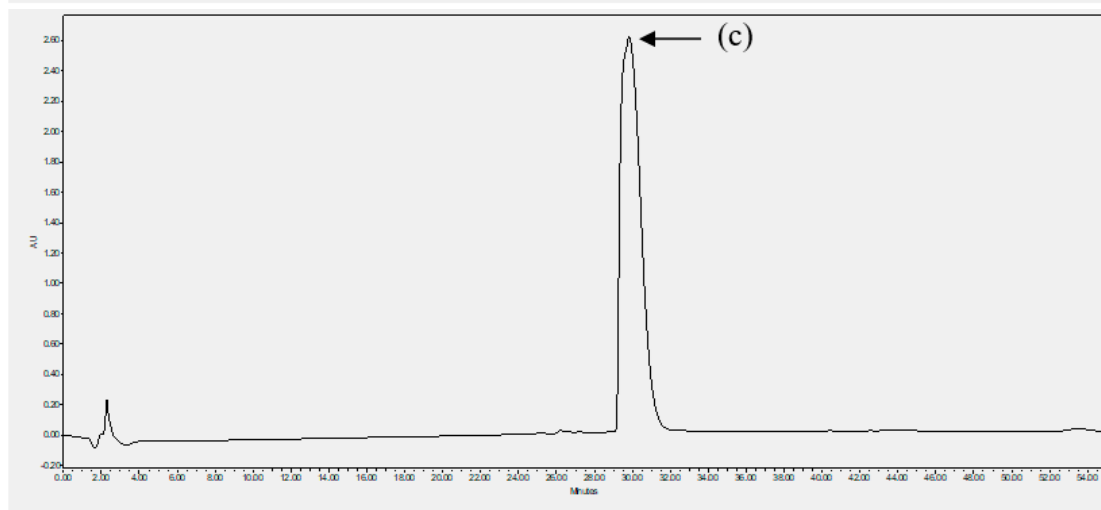

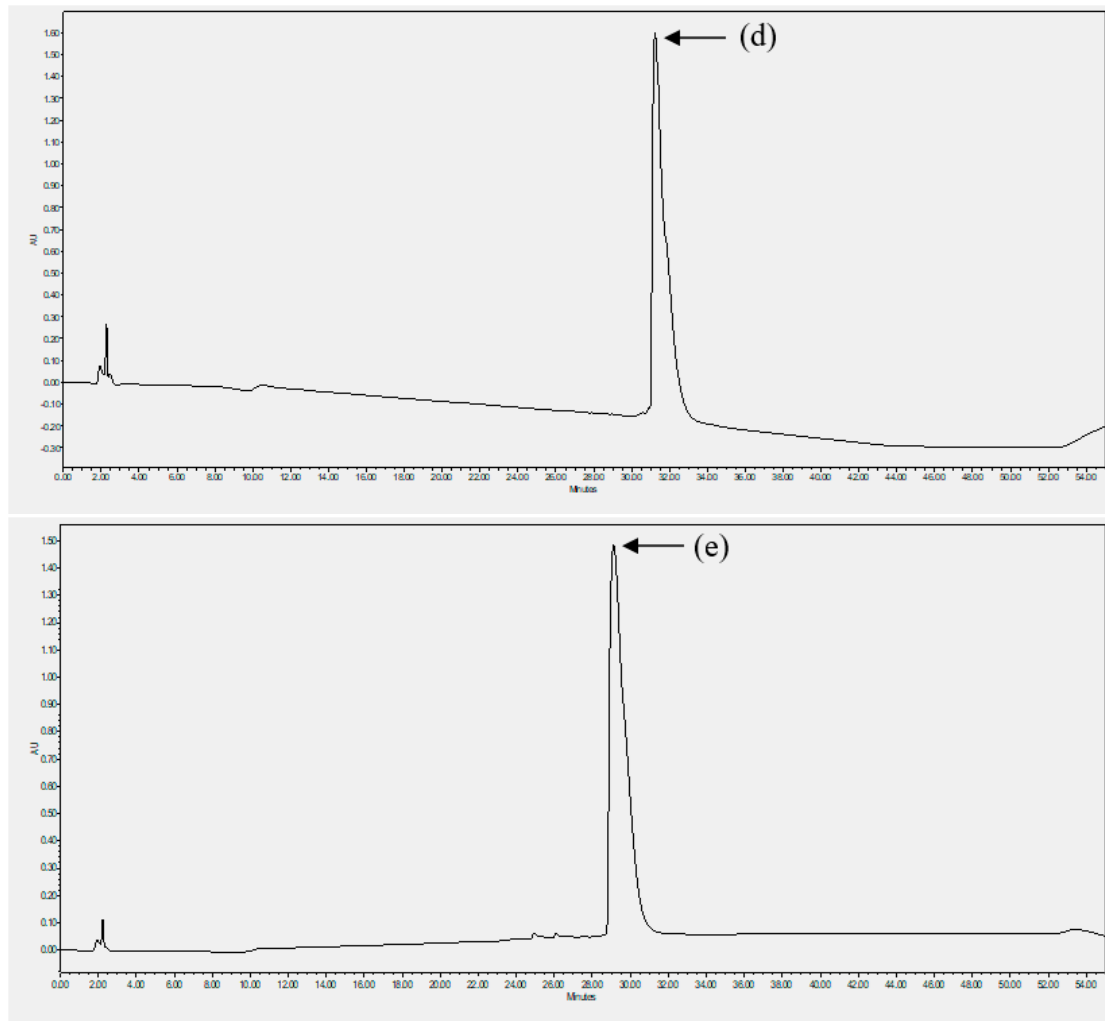

**Figure S1.** The RP-HPLC chromatograms of (a) VM, (b) VM-3K, (c) VM-3G, (d)VM-3W, (e) VM-3Y. The arrows stand for the elution peak of the corresponding peptides.

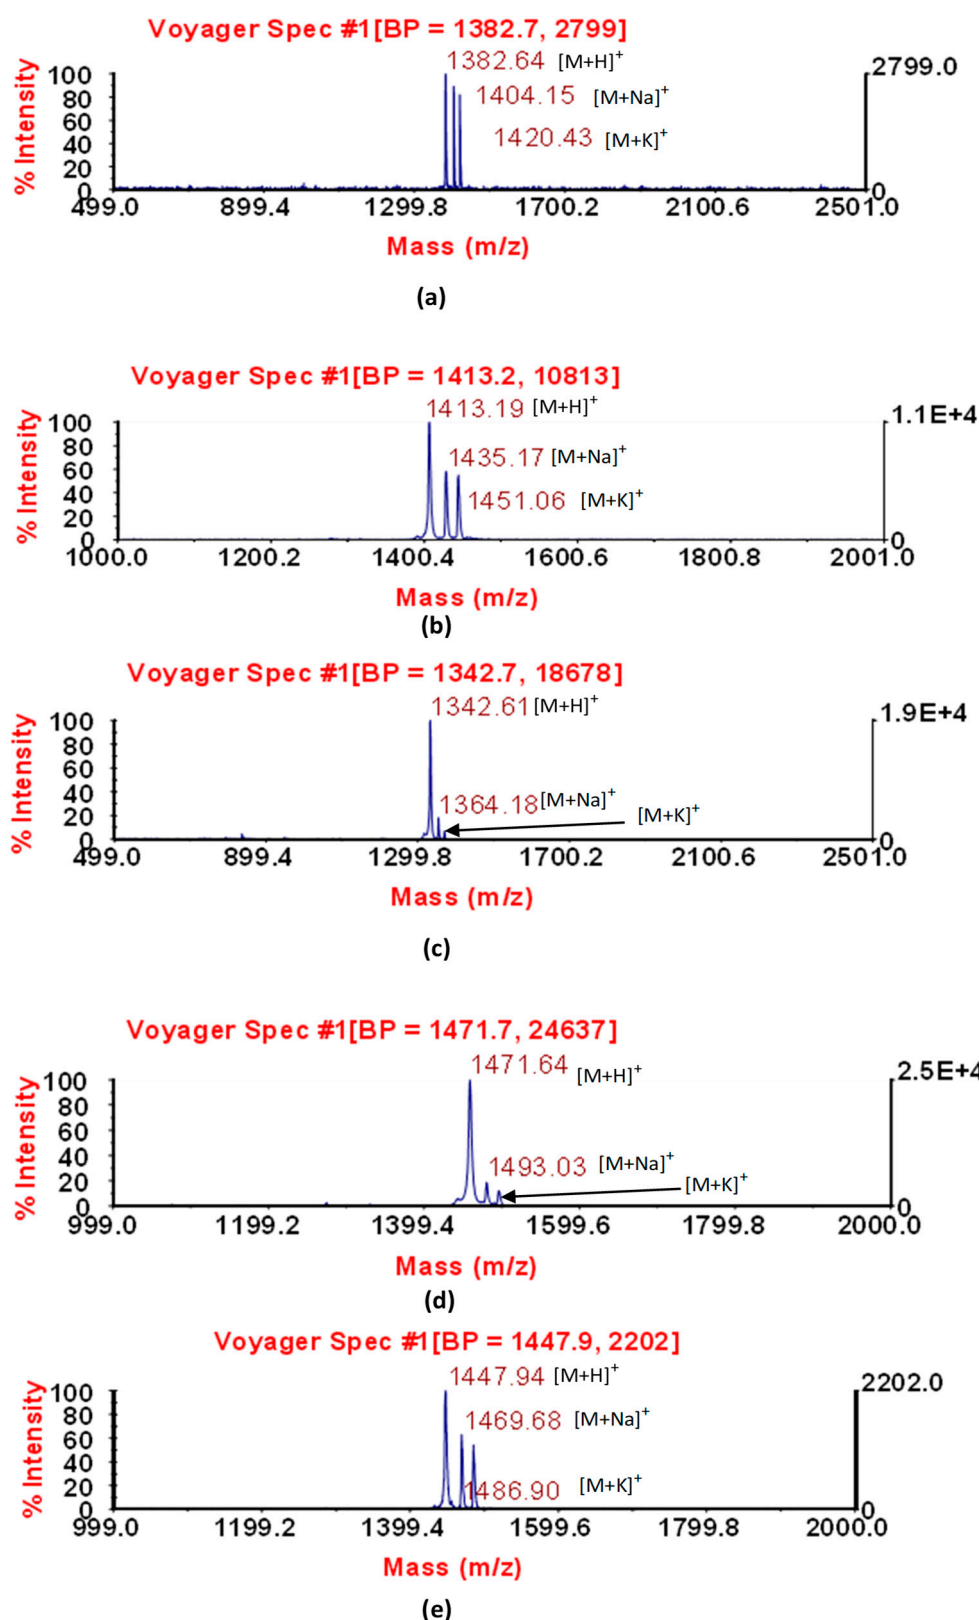

**Figure S2.** MALDI-TOF mass spectra of the corresponding peak in RP-HPLC of (a) VM, (b) VM-3K, (c) VM-3G, (d) VM-3W, (e) VM-3Y. The peaks corresponding to singly charged protonated ions of the peptide ( $m/z$  monoisotopic peaks:  $[M+H]^+$ , sodium ion adduct: +22 Da,  $[M+Na]^+$  and potassium ion adduct: +38 Da,  $[M+K]^+$ ) are indicated.
